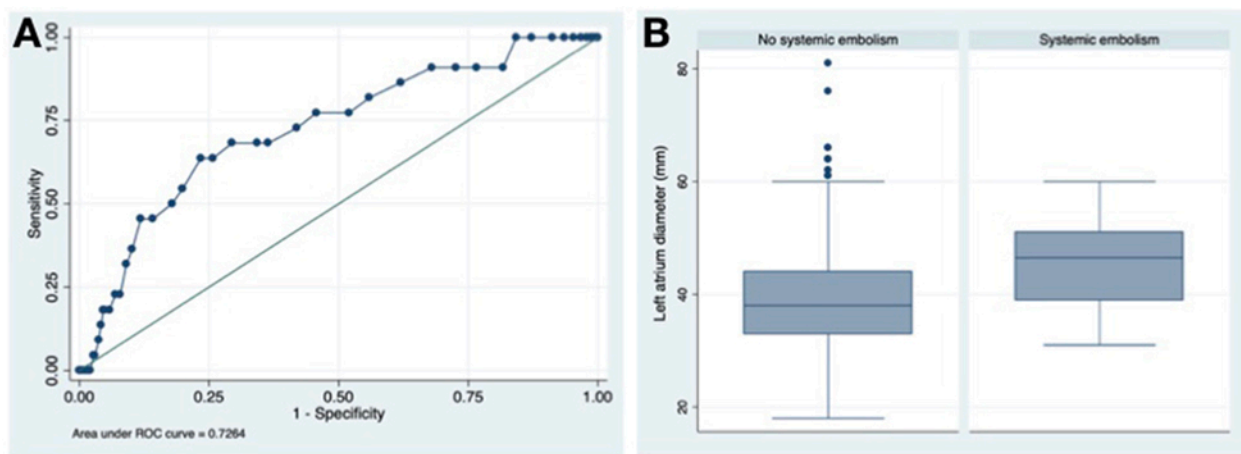

**Image 1. A) Receiver operator curve for the predictive value of left atrium diameter for systemic embolisms (AUC 0.73). B) Box plot demonstrates different left atrium diameter values in patients with and without systemic embolisms.**
